# Supplementary material for: The roles of surface chemistry, dissolution rate, and delivered dose in the cytotoxicity of copper nanoparticles
Source: Royal Society of Chemistry journal article supplement (doi:10.1039/c6nr09102d), 2017-01-01
Supplement: c6nr09102d1.pdf [file c6nr09102d1.pdf]

## Electronic Supplementary Information

### **The Roles of Surface Chemistry, Dissolution Rate, and Delivered Dose in the Cytotoxicity of Copper Nanoparticles**

Miao Shi,<sup>a,b</sup> Karen L. de Mesy Bentley,<sup>c</sup> Goutam Palui,<sup>d</sup> Hedi Mattoussi,<sup>d</sup> Alison Elder,<sup>e,#</sup> Hong Yang,<sup>b,#</sup>

<sup>a</sup> Department of Chemical Engineering, University of Rochester, Gavett Hall 206, Rochester, NY 14627, USA

<sup>b</sup> Department of Chemical and Biomolecular Engineering, University of Illinois at Urbana-Champaign, 600 S. Mathews Avenue, 114 Roger Adams Laboratory, MC-712, Urbana, IL 61801, USA

<sup>c</sup> Department of Pathology and Laboratory Medicine, University of Rochester, 601 Elmwood Ave, Rochester, NY 14642, USA

<sup>d</sup> Department of Chemistry and Biochemistry, Florida State University, 4006 Chemical Sciences Building, Tallahassee, Florida 32306, USA

<sup>e</sup> Department of Environmental Medicine, University of Rochester, 601 Elmwood Avenue, Rochester, NY 14642, USA

# Corresponding authors: [hy66@illinois.edu](mailto:hy66@illinois.edu); [Alison\\_Elder@URMC.Rochester.edu](mailto:Alison_Elder@URMC.Rochester.edu)

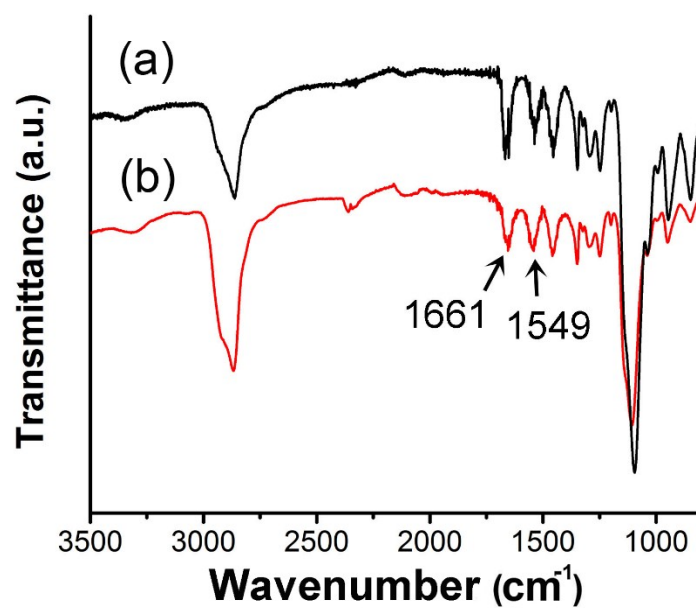

**Figure S1.** ATR-IR spectra of TA: (a) pure sample and (b) on the surface of copper nanoparticles.

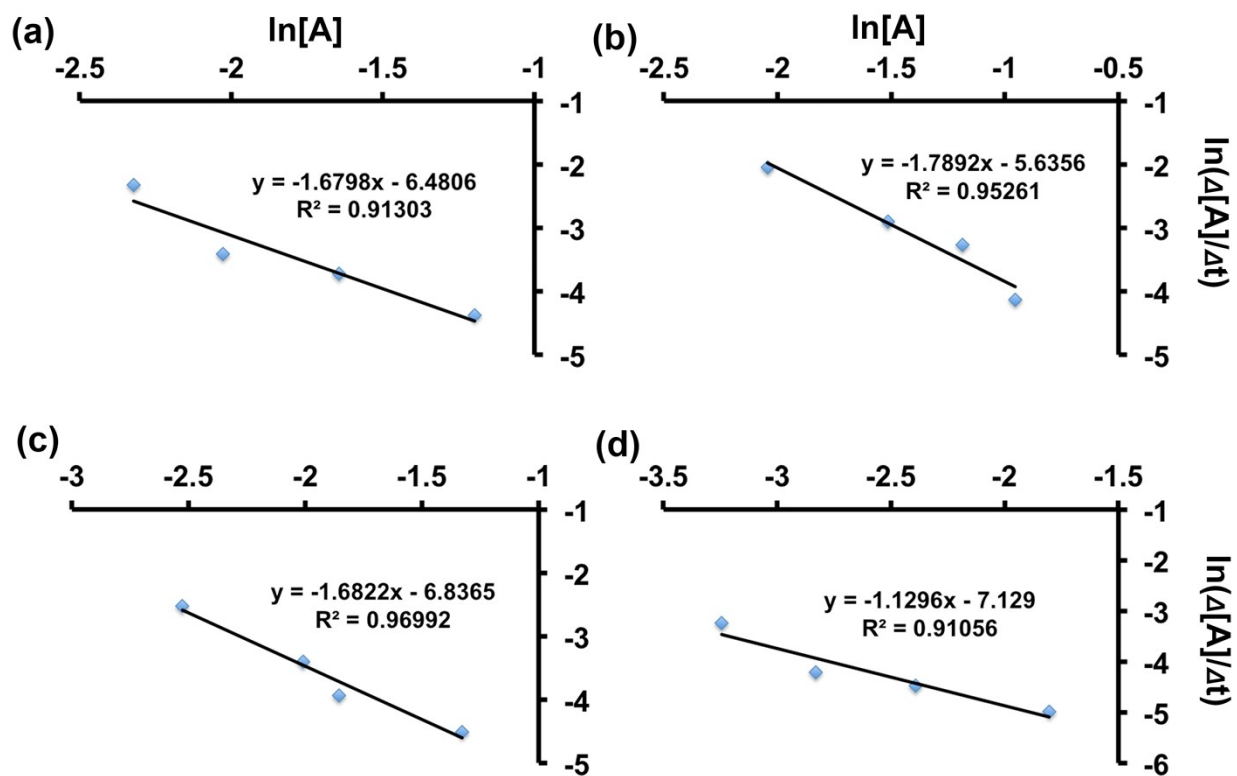

**Figure S2.** Dissolution kinetic curves for Cu-MHA at the concentration of (a) 10, (b) 25, (c) 50 and (d) 100  $\mu\text{g/mL}$ , respectively.

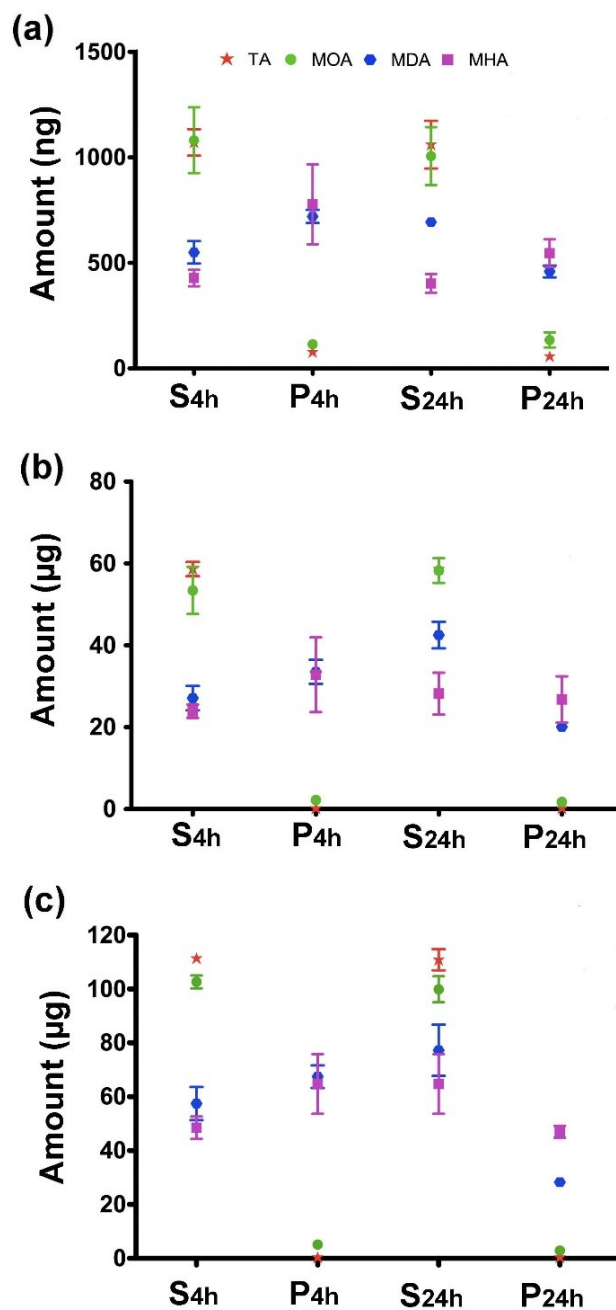

**Figure S3.** *In vitro* dosimetry of copper samples at (a) 1, (b) 50, and (c) 100 µg/mL, respectively (S: copper in supernatant, not associated with cells; P: copper in pellet, associated with cells).

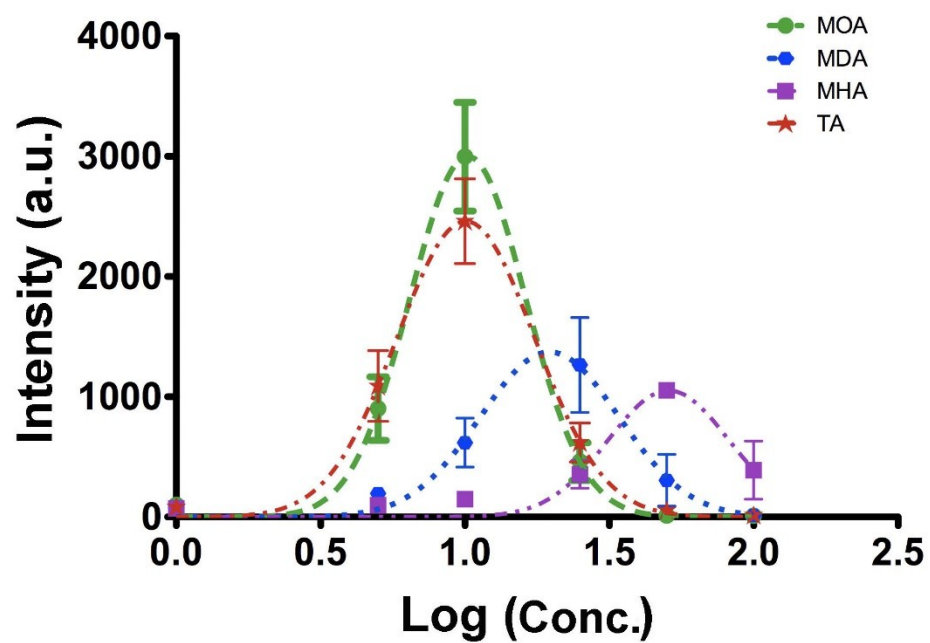

**Figure S4.** Luciferase response plots of intensity at a function of log (concentration) at exposure time of 24 h.

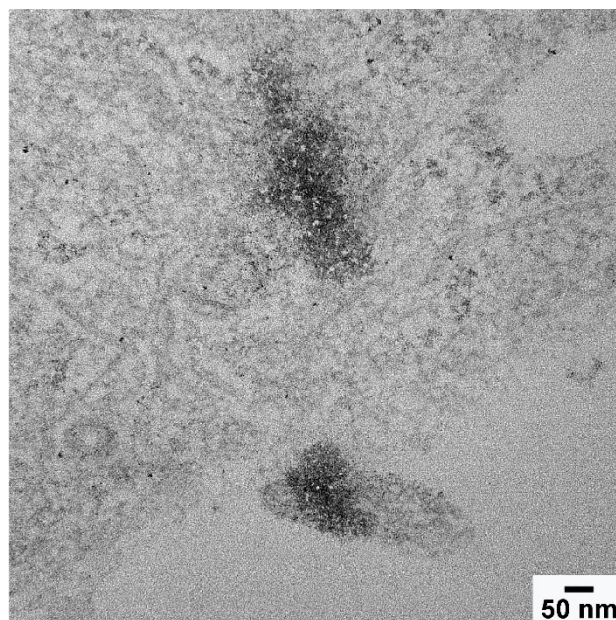

**Figure S5.** TEM micrograph of Cu-MOA (25  $\mu\text{g/mL}$ ) incubated with A549luc cells for 4 h exposure.

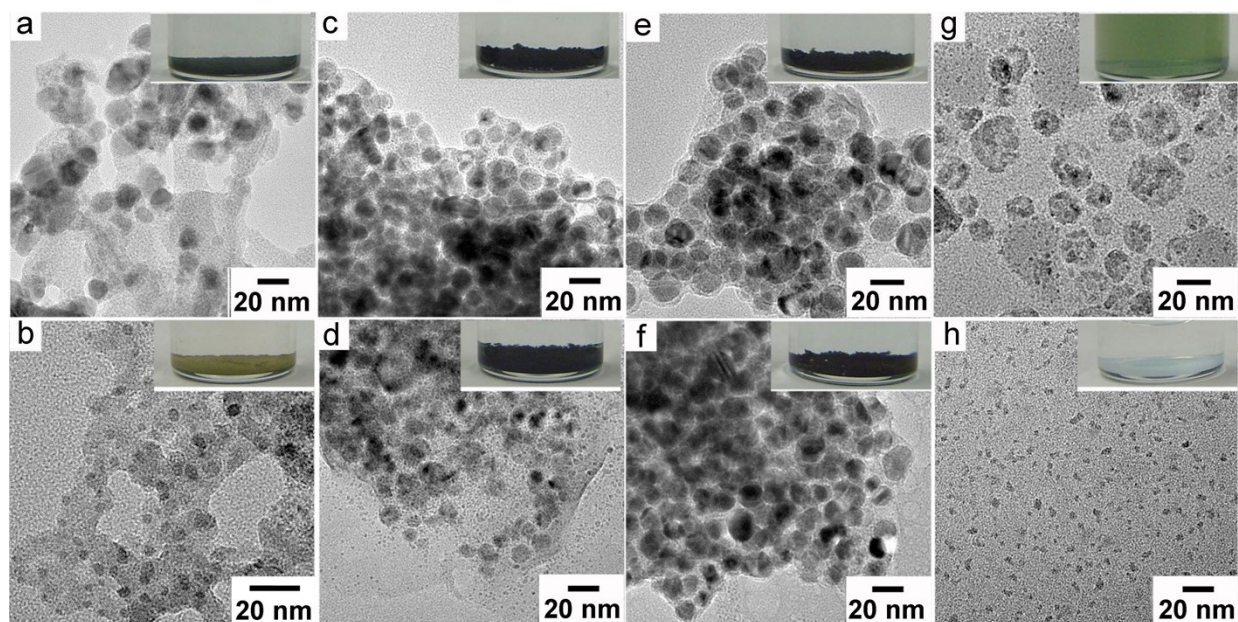

**Figure S6.** TEM micrographs of (a, b) Cu-MOA, (c, d) Cu-MDA, (e, f) Cu-MHA and (g, h) Cu-TA after the oxidation for (a, c, e, g) 20 and (b, d, f, h) 48 h, respectively, in PBS at room temperature. Insets are corresponding photographs of the samples after oxidation.

**Table S1.** Values of reaction order of copper in its dissolution at different concentrations

| Amount<br>( $\mu\text{g-Cu/mL}$ ) | 10     | 25     | 50     | 100    | Mean $\pm$ SD     |
|-----------------------------------|--------|--------|--------|--------|-------------------|
| Cu-MOA*                           | (2.62) | (2.46) | (2.70) | (2.08) | (2.47 $\pm$ 0.27) |
| Cu-MDA                            | 1.41   | 1.65   | 1.36   | 0.91   | 1.33 $\pm$ 0.31   |
| Cu-MHA                            | 1.68   | 1.79   | 1.68   | 1.13   | 1.57 $\pm$ 0.30   |
| Cu-TA*                            | (5.89) | (5.53) | (4.31) | (4.36) | (5.02 $\pm$ 0.81) |

\*  $R^2$  values for these two samples are  $< 0.9$ , thus the reactions were complex and could not be analyzed as simple dissolutions, so the values are shown in parentheses.

**Table S2.**  $S_{max}$  of luciferase response of copper samples at exposure time of 24 h without defining  $I_t$ .

| Type of Cu NPs                     | Cu-MOA          | Cu-MDA        | Cu-MHA        | Cu-TA         |
|------------------------------------|-----------------|---------------|---------------|---------------|
| $S_{max}$ ( $\mu\text{g-Cu/mL}$ )* | $3194 \pm 2405$ | $236 \pm 122$ | $398 \pm 349$ | $367 \pm 113$ |

\* Average with standard deviation.
